# Supplementary material
Source: MDPI journal article supplement (https://www.mdpi.com/2674-1024/1/1/2)
Supplement: s1 [file s1]

Supplemental Table S1a.- Effect of different KNO<sub>3</sub> treatments on the germination rate of pea seeds

| <b>% Germination<br/>KNO<sub>3</sub> (mM)</b> | <b>Day 1</b> | <b>Day 2</b> | <b>Day 3</b> |
|-----------------------------------------------|--------------|--------------|--------------|
| <b>0</b>                                      | 20           | 80           | 100          |
| <b>0.25</b>                                   | 10           | 90           | 100          |
| <b>0.5</b>                                    | 10           | 90           | 100          |
| <b>1</b>                                      | 33.3         | 90           | 100          |
| <b>5</b>                                      | 10           | 85.5         | 100          |
| <b>10</b>                                     | 0            | 60           | 100          |
| <b>20</b>                                     | 15           | 70           | 100          |
| <b>40</b>                                     | 0            | 55           | 100          |
| <b>80</b>                                     | 10           | 30           | 100          |

Supplemental Table S1b.- Effect of different KNO<sub>3</sub> concentrations on some growth parameters in pea seedling after 4 days of treatments

| <b>KNO<sub>3</sub> (mM)</b> | <b>FW (% from control)</b> | <b>Length (% from control)</b> |
|-----------------------------|----------------------------|--------------------------------|
| <b>0</b>                    | 100                        | 100                            |
| <b>0.25</b>                 | 117.9                      | 118.9                          |
| <b>0.5</b>                  | 90                         | 88.51                          |
| <b>1</b>                    | 97.6                       | 81.2                           |
| <b>5</b>                    | 90.7                       | 77.9                           |
| <b>10</b>                   | 87.4                       | 85.3                           |
| <b>20</b>                   | 88.1                       | 70.51                          |
| <b>40</b>                   | 80.1                       | 75.1                           |
| <b>80</b>                   | 77.7                       | 64.5                           |
